# Supplementary material for: A genomic and evolutionary approach reveals non-genetic drug resistance in malaria
Source: PubMed Central journal article supplement (PMC4272547; doi:10.1186/s13059-014-0511-2), 2014-11-14

A

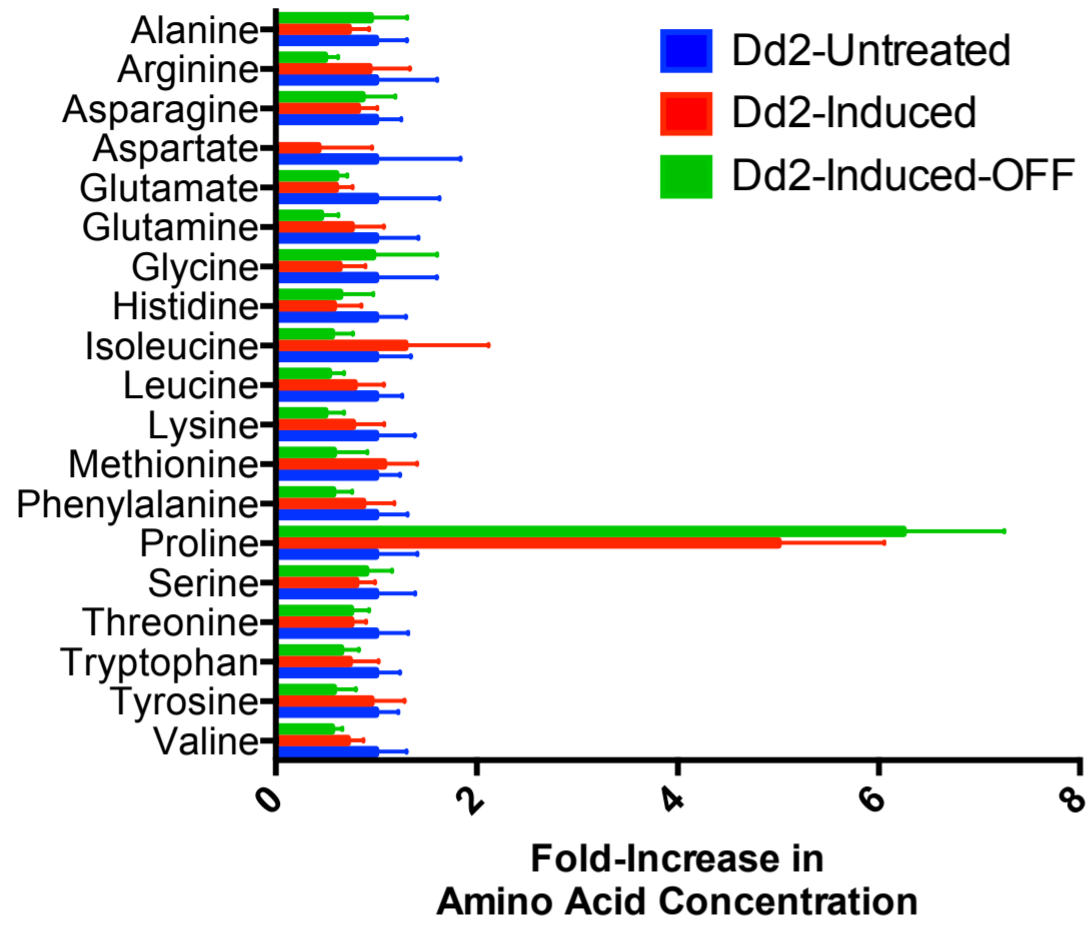

B

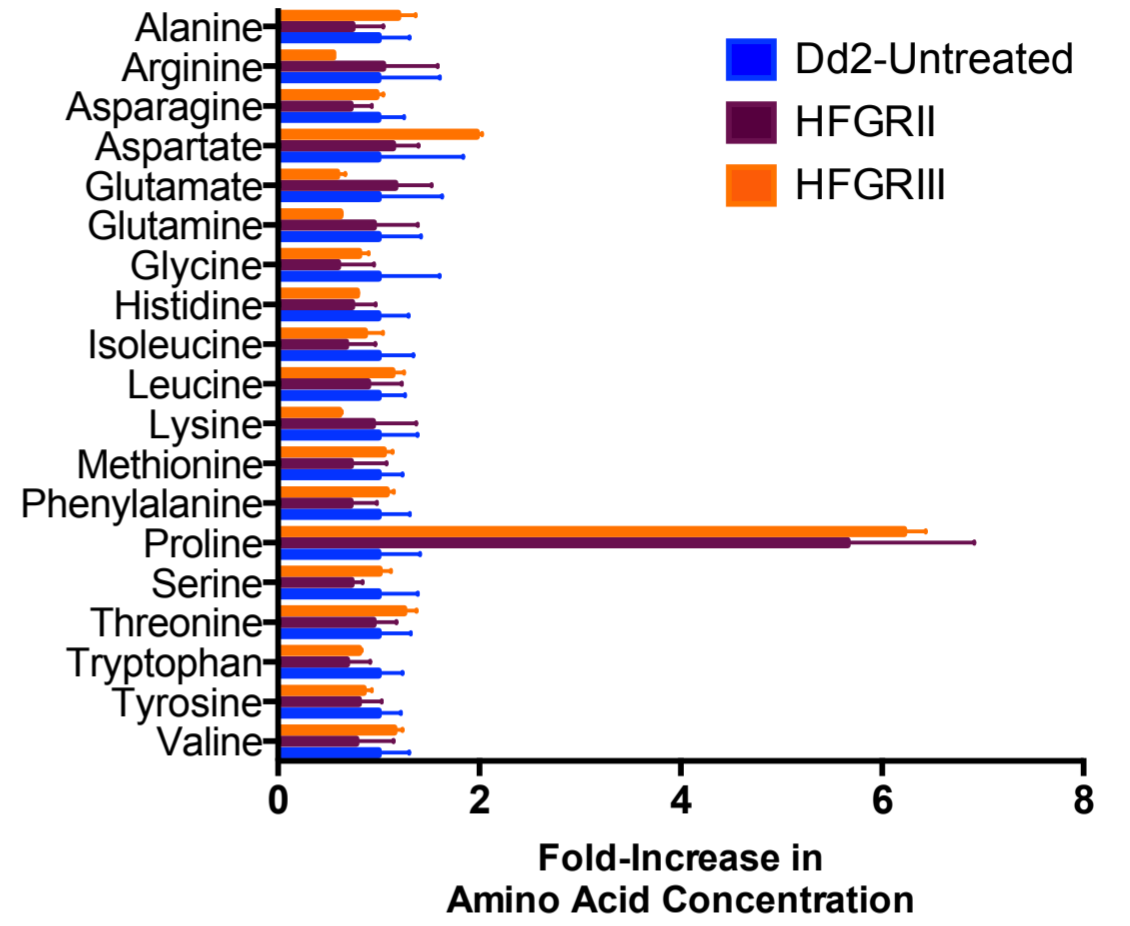

Supplement: 13059_2014_511_MOESM11_ESM.pdf [file 13059_2014_511_MOESM11_ESM.pdf]
