# Supplementary material for: A genomic and evolutionary approach reveals non-genetic drug resistance in malaria
Source: PubMed Central journal article supplement (PMC4272547; doi:10.1186/s13059-014-0511-2), 2014-11-14
Supplement: 13059_2014_511_MOESM15_ESM.pdf [file 13059_2014_511_MOESM15_ESM.pdf]

A

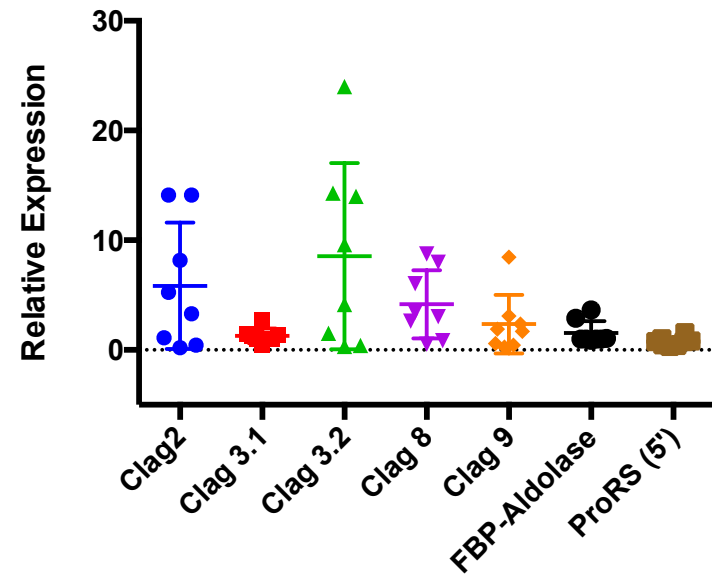

B

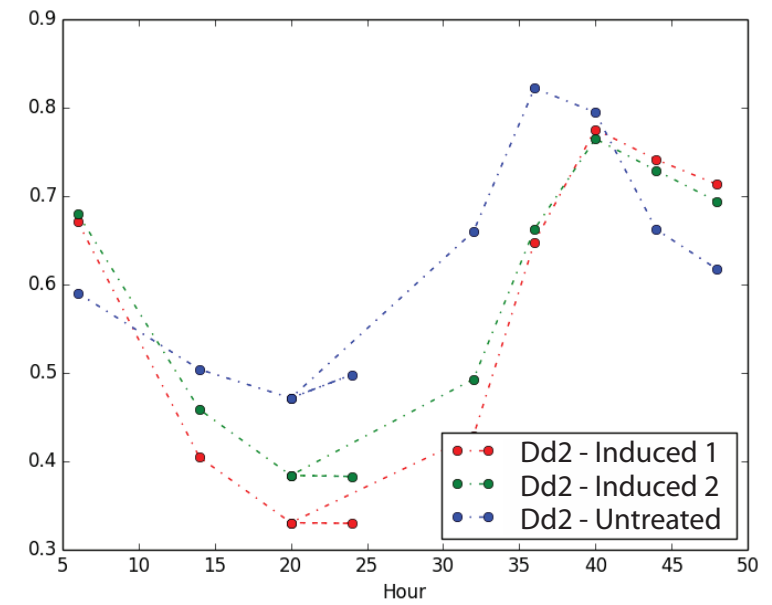

C

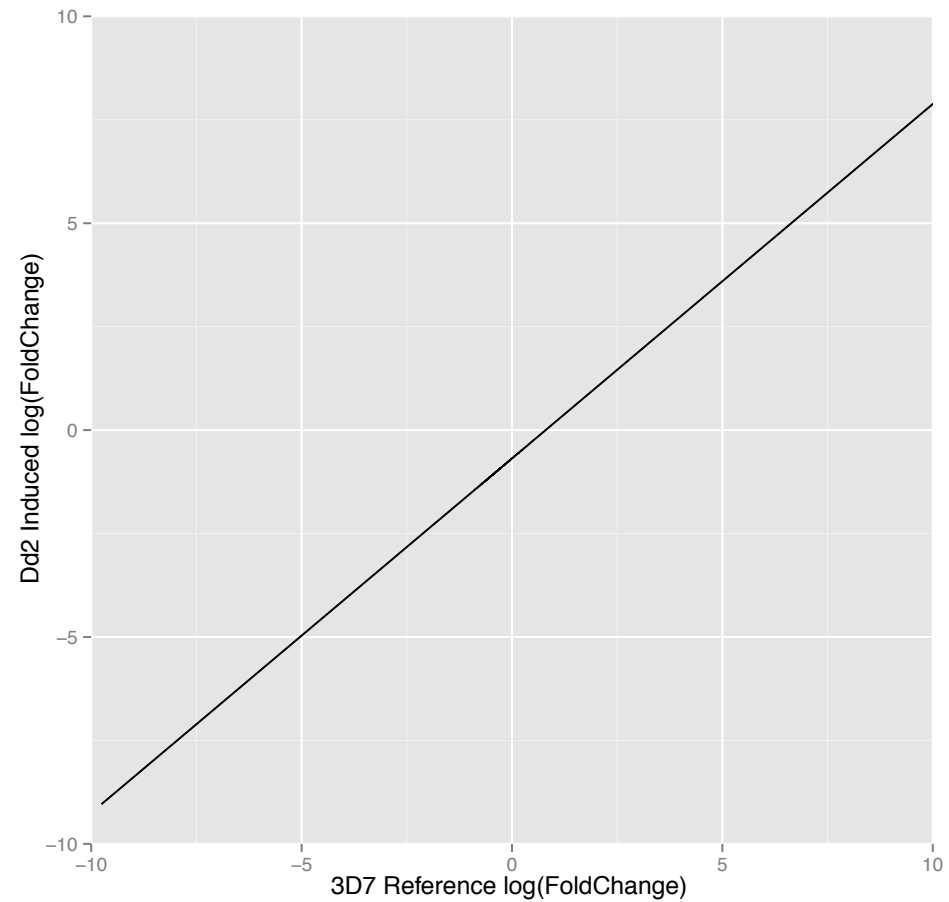

D

| PlasmoDB ID     | Gene Description                               | 3D7 Life Cycle Control | Dd2 Induction 1 | Dd2 Induction 2 | Dd2 Induction - Average |
|-----------------|------------------------------------------------|------------------------|-----------------|-----------------|-------------------------|
| PF3D7_0310600.2 | SAC3/GNAP family-related protein, putative     | 11.81                  | -9.19           | -8.55           | -8.87                   |
| PF3D7_0318700   | trophozoite stage antigen                      | 4.95                   | 13.16           | 14.83           | 14.00                   |
| PF3D7_0723200   | conserved Plasmodium protein, unknown function | 0.96                   | 11.57           | 11.93           | 11.75                   |
| PF3D7_1209500.1 | cGMP-specific phosphodiesterase (PDE1)         | 1.98                   | 13.27           | 13.64           | 13.46                   |
| PF3D7_1209500.2 | cGMP-specific phosphodiesterase (PDE1)         | 10.90                  | 0.61            | 0.95            | 0.78                    |
| PF3D7_1233200.1 | conserved Plasmodium protein, unknown function | 1.22                   | 11.26           | 12.92           | 12.09                   |
| PF3D7_1419800.1 | glutathione reductase (GR)                     | -9.76                  | -1.51           | -0.29           | -0.90                   |
